# Supplementary material
Source: MDPI journal article supplement (https://www.mdpi.com/2073-4441/15/2/252)
Supplement: s1 [file s1]

# Microplastics in Landfill Leachate: A Comprehensive Review on Characteristics, Detection, and Their Fates during Advanced Oxidation Processes

Lan Wang<sup>1</sup>, Hui Wang<sup>2,\*</sup>, Qiujie Huang<sup>2</sup>, Changfu Yang<sup>2</sup>, Luochun Wang<sup>1</sup>, Ziyang Lou<sup>2,3,4</sup>, Qian Zhou<sup>1</sup>, Tiantian Wang<sup>1</sup> and Chengqi Ning<sup>1</sup>

<sup>1</sup> School of College of Environmental and Chemical Engineering, Shanghai University of Electric Power, Shanghai 200090, China

<sup>2</sup> School of Environmental Science and Engineering, Shanghai Jiao Tong University, Shanghai Engineering Research Center of Solid Waste Treatment and Resource Recovery, Shanghai 200240, China

<sup>3</sup> China-UK Low Carbon College, Shanghai Jiao Tong University, Shanghai 200240, China

<sup>4</sup> China Institute for Urban Governance, Shanghai Jiao Tong University, Shanghai 200240, China

\* Correspondence: wanghui2015@sjtu.edu.cn

**Table S1.** Common microplastic properties.

| Plomer | Full Name                             | Elemental Structure                                                                                                        | Bond Type                                 | Carbon Content | Density (g/cm <sup>3</sup> ) |
|--------|---------------------------------------|----------------------------------------------------------------------------------------------------------------------------|-------------------------------------------|----------------|------------------------------|
| PE     | Polyethylene                          | (C <sub>2</sub> H <sub>4</sub> ) <sub>n</sub>                                                                              | C-C                                       | 86%            | 0.96                         |
| PP     | Polypropylene                         | (C <sub>3</sub> H <sub>6</sub> ) <sub>n</sub>                                                                              | C-C                                       | 86%            | 0.89~0.91                    |
| PVC    | Polyvinyl chloride                    | (C <sub>2</sub> H <sub>3</sub> Cl) <sub>n</sub>                                                                            | C-C                                       | 38%            | 1.35–1.50                    |
| PS     | Polystyrene                           | (C <sub>8</sub> H <sub>8</sub> ) <sub>n</sub>                                                                              | C-C                                       | 92%            | 1.05                         |
| ABS    | Acrylonitrile butadiene styrene resin | (C <sub>8</sub> H <sub>8</sub> ·C <sub>4</sub> H <sub>6</sub> ·C <sub>3</sub> H <sub>3</sub> N) <sub>x</sub>               | C-C, C=C, Benzene                         | 85%            | 1.05–1.18                    |
| PET    | Polyethylene terephthalate            | (C <sub>10</sub> H <sub>8</sub> O <sub>4</sub> ) <sub>n</sub>                                                              | Benzene                                   | 63%            | 1.30–1.40                    |
| PU     | Poly urethane                         | (C <sub>10</sub> H <sub>8</sub> N <sub>2</sub> O <sub>2</sub> C <sub>6</sub> H <sub>14</sub> O <sub>3</sub> ) <sub>n</sub> | The backbone contains duplicate urethanes | 89%            | 0.04–0.06                    |
| EVA    | Ethylene-vinyl acetate copolymer      | (C <sub>2</sub> H <sub>4</sub> ) <sub>x</sub> ·(C <sub>4</sub> H <sub>6</sub> O <sub>2</sub> ) <sub>y</sub>                | Vinyl acetate monomer                     | 63%            | 0.92–0.98                    |
| PA     | PolyamideNylon                        | (NH-(CH <sub>2</sub> ) <sub>5</sub> -CO) <sub>n</sub>                                                                      | Amide groups                              | 34.80%         | 1–1.16                       |
| PES    | polyester                             | (OCH <sub>2</sub> CH <sub>2</sub> O <sub>2</sub> CCH <sub>2</sub> CH <sub>2</sub> CO) <sub>n</sub>                         | Aromatic rings<br>Ester groups            | 41.70%         | 1.37–1.51                    |
| EP     | Epoxy resin                           | (C <sub>11</sub> H <sub>12</sub> O <sub>3</sub> ) <sub>n</sub>                                                             | Epoxy groups                              | 68.70%         | 1.2                          |
| PF     | Phenol-formaldehyde resin             | (-C <sub>6</sub> H <sub>6</sub> -CH <sub>2</sub> -)-OH                                                                     | Benzene                                   | 77%            | 1.22                         |
| PPC    | Poly propylene carbonate              | HO-(-CH <sub>2</sub> -CH(CH <sub>3</sub> )-O-COO-) <sub>n</sub> -H                                                         | C-O carboxyl                              | 30%            | 1.1–1.3                      |

|         |                                   |                          |                      |        |             |
|---------|-----------------------------------|--------------------------|----------------------|--------|-------------|
| PMMA    | Polymethyl methacrylate           | $(C_5O_2H_8)_n$          | C-C                  | 60%    | 1.15–1.19   |
| PDMS    | Polydimethylsiloxane              | $(C_2H_6OSi)_n$          | Dimethyl siloxane    | 86.00% | 0.965–0.980 |
| PTFE    | Polytetrafluoroethylene           | $(C_2F_4)_n$             | Tetrafluoroethylene  | 86.00% | 2.20        |
| PVA     | Polyvinyl alcohol                 | $(C_2H_4O)_n$            | -OH                  | 38.00% | 1.26–1.29   |
| PVB     | Polyvinyl butyral resin           | $H_2(C_8H_{14}O_2)_n$    | C=C                  | 92.00% | 1.08–1.10   |
| PMP     | Poly(4-methyl-1-pentene)          | $C_7H_{14}O_3$           | C-C                  | 85.00% | 0.943~0.953 |
| EAA     | Ethylene acrylic acid             | $C_{13}H_{15}O_2$        | C=C                  | 63.00% | 0.96        |
| PAEK    | Polyetherketoneketone             | $(C_{13}H_{12}O_2)_n$    | Benzene, -C=O        | 89.00% | 1.35        |
| PAM     | Polyacrylamide, polyacrylic amide | $(C_3H_5NO)_n$           | C-C                  | 63.00% | 1.30        |
| kevlar  | Kevlar                            | $(C_{14}H_{10}O_2N_2)_n$ | Benzene              | 34.80% | 1.44        |
| PDO     | Propanediol                       | $C_3H_8O_2$              | C-C, -OH             | 41.70% | 1.05        |
| PSB     | Poly(styrene-co-butadiene)        | $C_{17}H_{22}O_2$        | C=C                  | 68.70% | 0.9–0.95    |
| PAA     | Polyacrylic acid                  | $(C_3H_4O_2)_n$          | C-C, C=O             | 77.00% | 1.09        |
| PBMA    | Poly(n-butylamethacrylate)        | $C_{18}H_{20}N_6$        | -CHO                 | 30.00% | 1.30        |
| PBT     | Polybutylene terephthalate        | $C_{12}H_{12}O_4$        | Benzene              | 60.00% | 1.32        |
| PCL     | Polycaprolactone                  | $C_6H_{10}O_2$           | -CHO                 | 63.16% | 1.02        |
| PEMA    | Polyethylmethacrylate             | $C_6H_{10}O_2$           | -CHO                 | 63.16% | 0.91        |
| PiBMA   | Polyisobutyl methacrylate         | $C_8H_{14}O_2$           | -CHO                 | 54.50% | 0.89        |
| PVAC    | Polyvinyl acetate                 | $(C_4H_6O_2)_n$          | -COOH                | 66.60% | 1.19        |
| PVDF    | Polyvinylidene difluoride         | $(CH_2CF_2)_n$           | C-C                  | 57.50% | 1.78        |
| PVP     | Poly(n-vinyl pyrrolidone)         | $(C_6H_9NO)_n$           | Alkane ketone        | 76.80% | 1.23–1.29   |
| RUBBER  | Poly-(cis1,4-isoprene)            | $C_{22}H_{28}N_2O_6S$    | Isoprene             | 78.00% | 1.30        |
| PEUR    | Polyether urethane                | $C_{15}H_{22}N_2O_2$     | C-O-C                | 50.70% | 1.25        |
| PEC     | Chlorinated polyethylene          | $C_4H_7Cl$               | C=C                  | 70.50% | 0.93–0.96   |
| acrylic | Acrylic                           | $C_5H_8O_2$              | C-C                  | 47.40% | 1.19        |
| PAT     | Polyarylate                       | $C_8H_6O_4$              | Benzene, ester group | 79.70% | 1.20–1.25   |
